# Supplementary material for: Salivary Protein NlSP7 of The Brown Planthopper Functions As An Effector for Mediating Tricin Metabolism in Rice Plants
Source: Research Square preprint supplement (doi:10.21203/rs.3.rs-675382/v1), 2021-07-08
Supplement: Supplementary file 2 [file 3bd2eacebe1fd56f2092f05a.docx]

**Supporting information**

**Salivary protein NlSP7of the brown planthopper functions as an effector for mediating tricin metabolism in rice plants**

Gu Gong 1, 2, #, Long-Yu Yuan 1, #, Yi-Feng Li 1, Hang-Xiang Xiao 1, Yan-Fang Li 1, Yang Zhang 1, Wei-Jian Wu 2, Zhen-Fei Zhang 1, *

1 Guangdong Provincial Key Laboratory of High Technology for Plant Protection, Plant Protection Research Institute, Guangdong Academy of Agricultural Sciences, Guangzhou 510640, P R China

2 College of Plant Protection, South China of Agricultural University

* Correspondence: Zhen-fei Zhang, Guangdong Provincial Key Laboratory of High Technology for Plant Protection/Plant Protection Research Institute, Guangdong Academy of Agricultural Science, Guangzhou 510640, China.

E-mail address: zhangzhenfei@gdaas.cn

# These authors contributed equally to this work.

Declarations of interest: none.


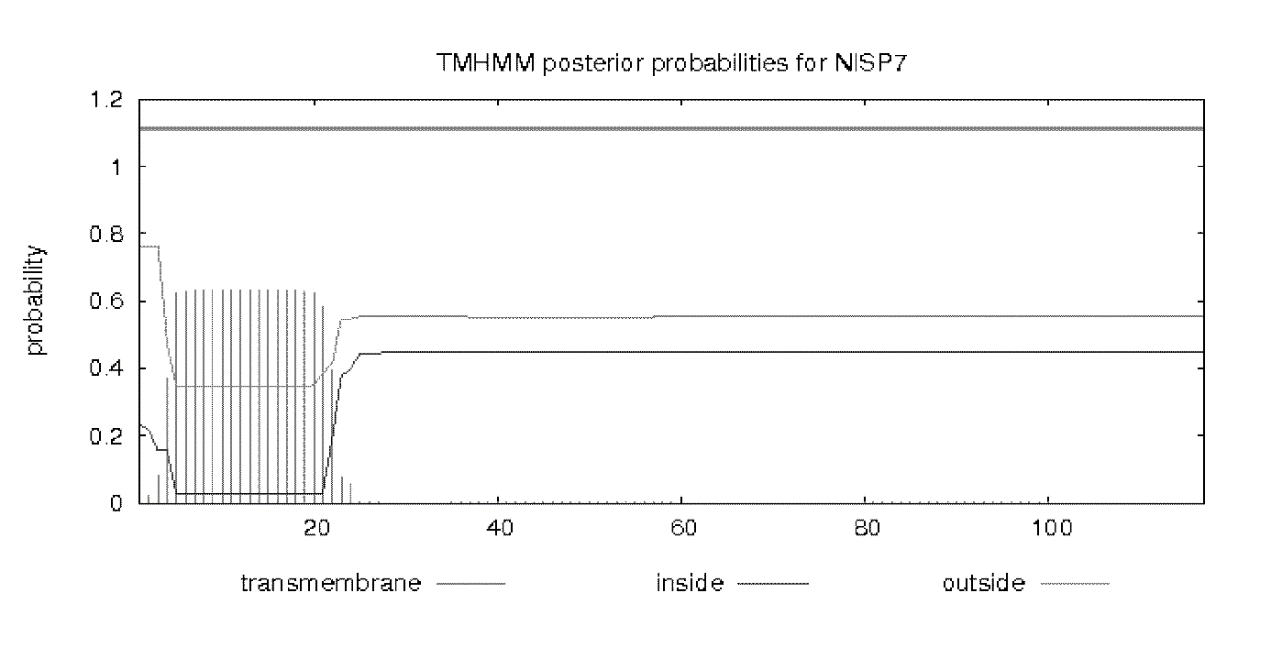


**Fig. S1** Posterior probabilities predicted by the TMHMM server for NLSP7 and prediction of transmembrane helices in NLSP7 protein. Prediction of transmembrane helices in NLSP7protein. Transmembrane position is 1–20 base pairs of *NLSP7.*

**
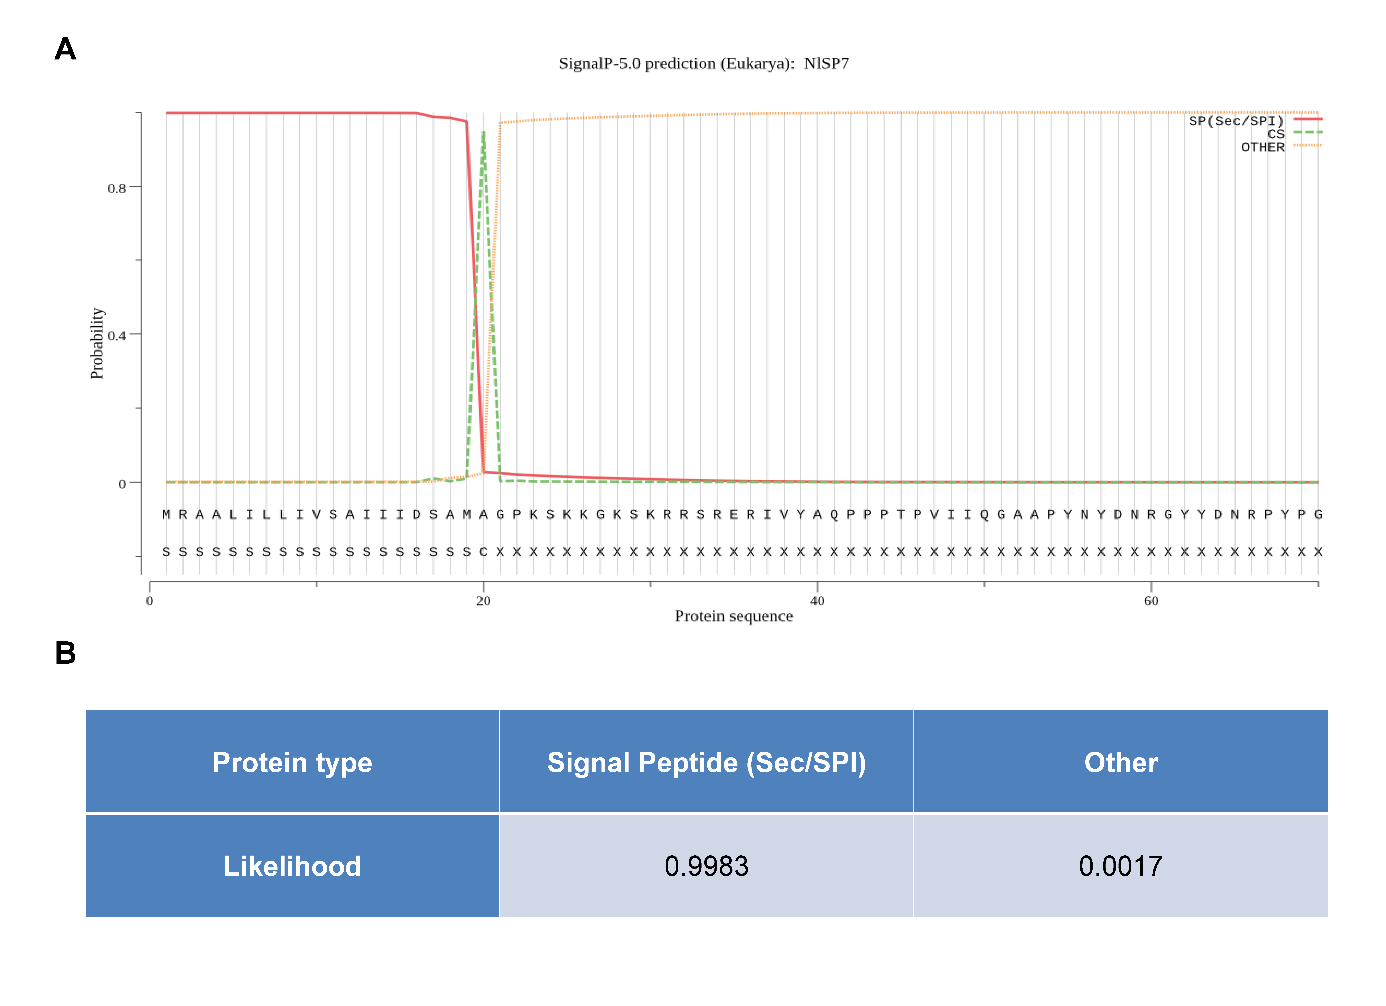
**

**Fig. S2** Signal peptide (sec/ Signal Peptidase I) prediction of NLSP7 using the SignalP 5.0 server. A-B cleavage site between pos. 20 and 21: AMA -GP (sequence position). Probability: 0.9477.


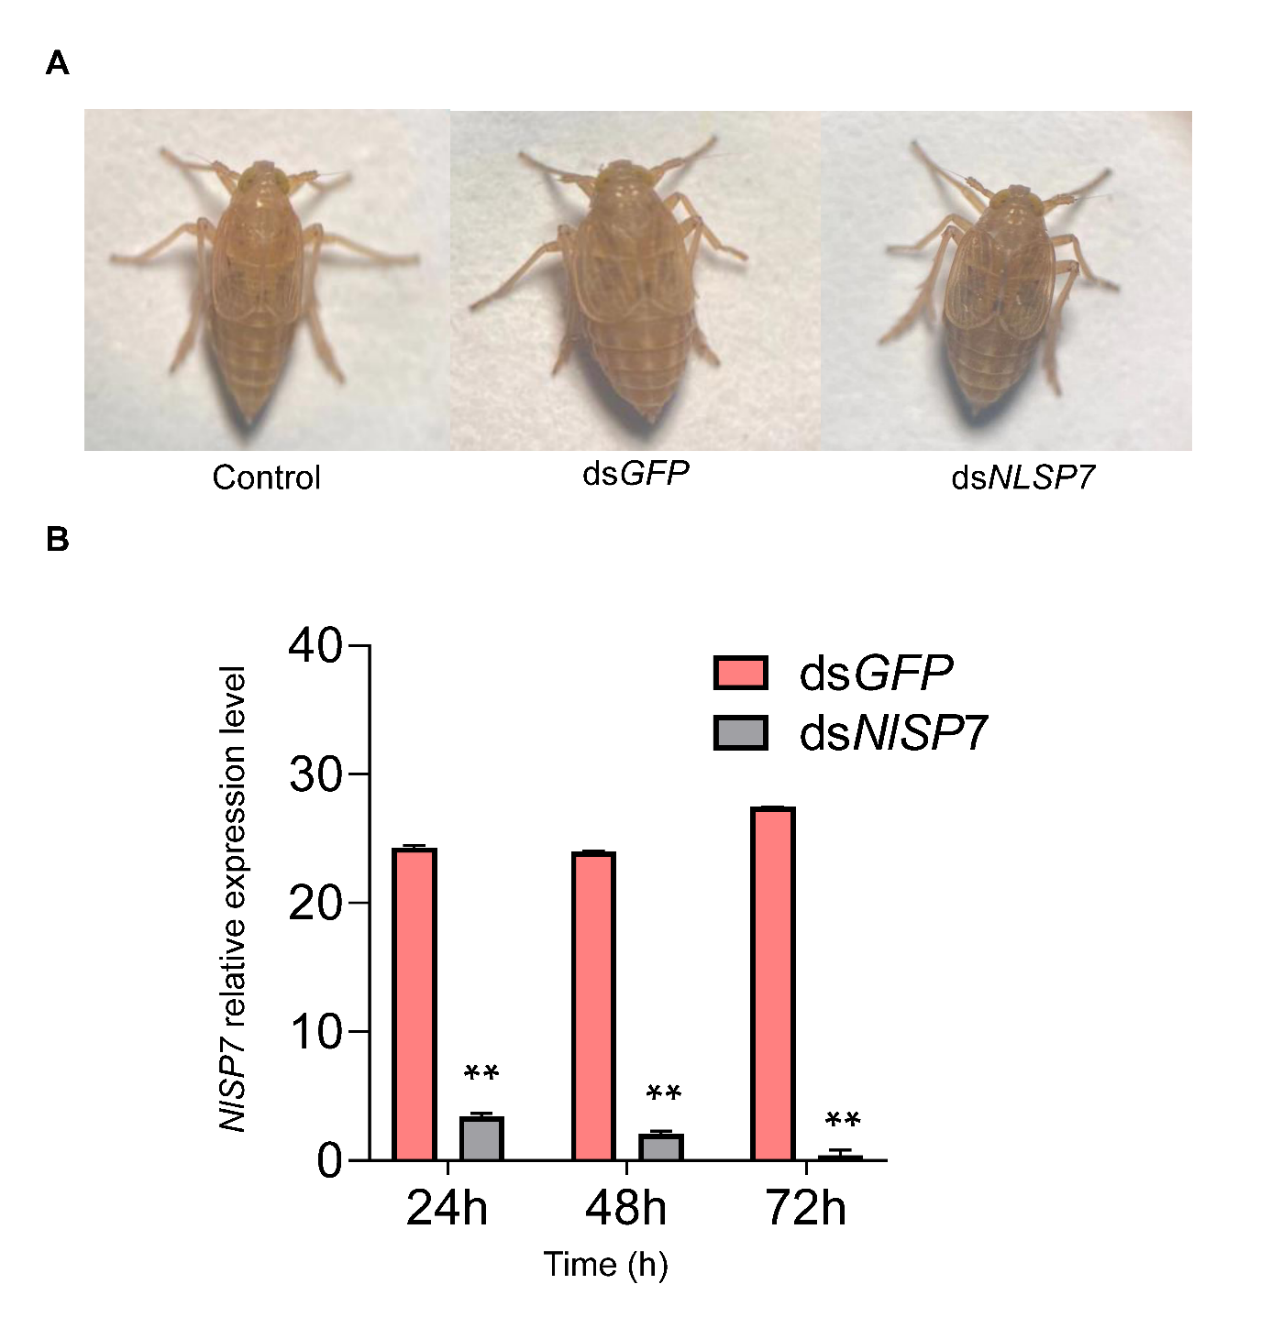


**Fig. S3** Brown planthoppers were injected with specific double-stranded RNA. A BPHs after three days of three different treatments. B the expression level of *NLSP7* was determined at 24 h intervals. Data are represented as the mean ± SD from three biological replicates. Asterisks (**) indicate significant difference (P < 0.01, *t*-test).


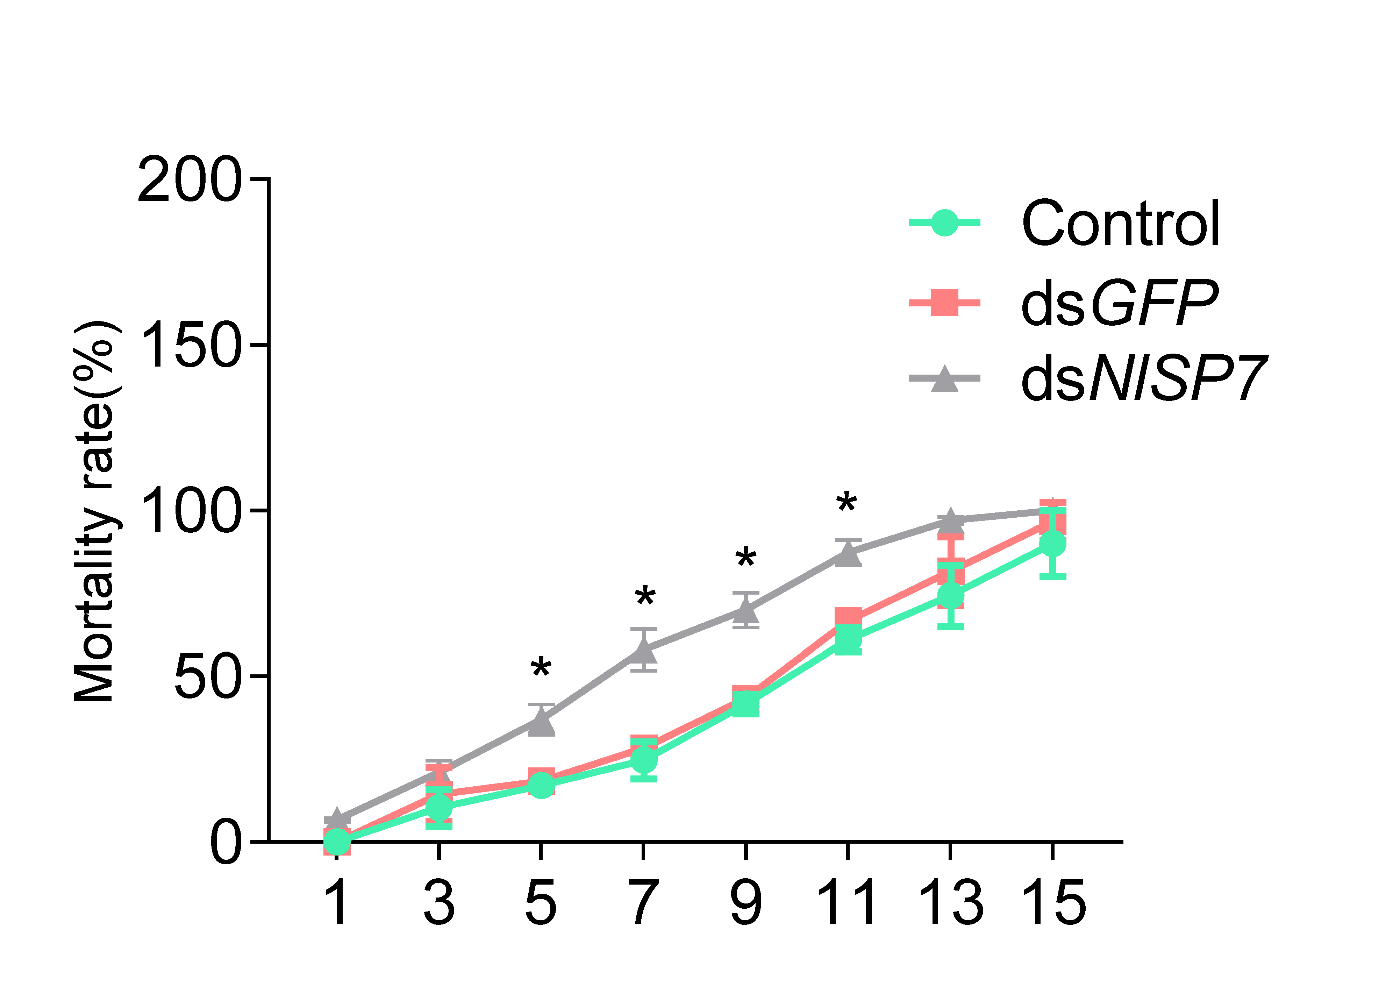


**Fig. S4** Mortality rate of BPHs fed TN1 rice, repeated three times, respectively. Each treatment repeated with 100 brown planthoppers. Data are represented as the mean ± SD (*P* < 0.01, Duncan’s multiple range test).


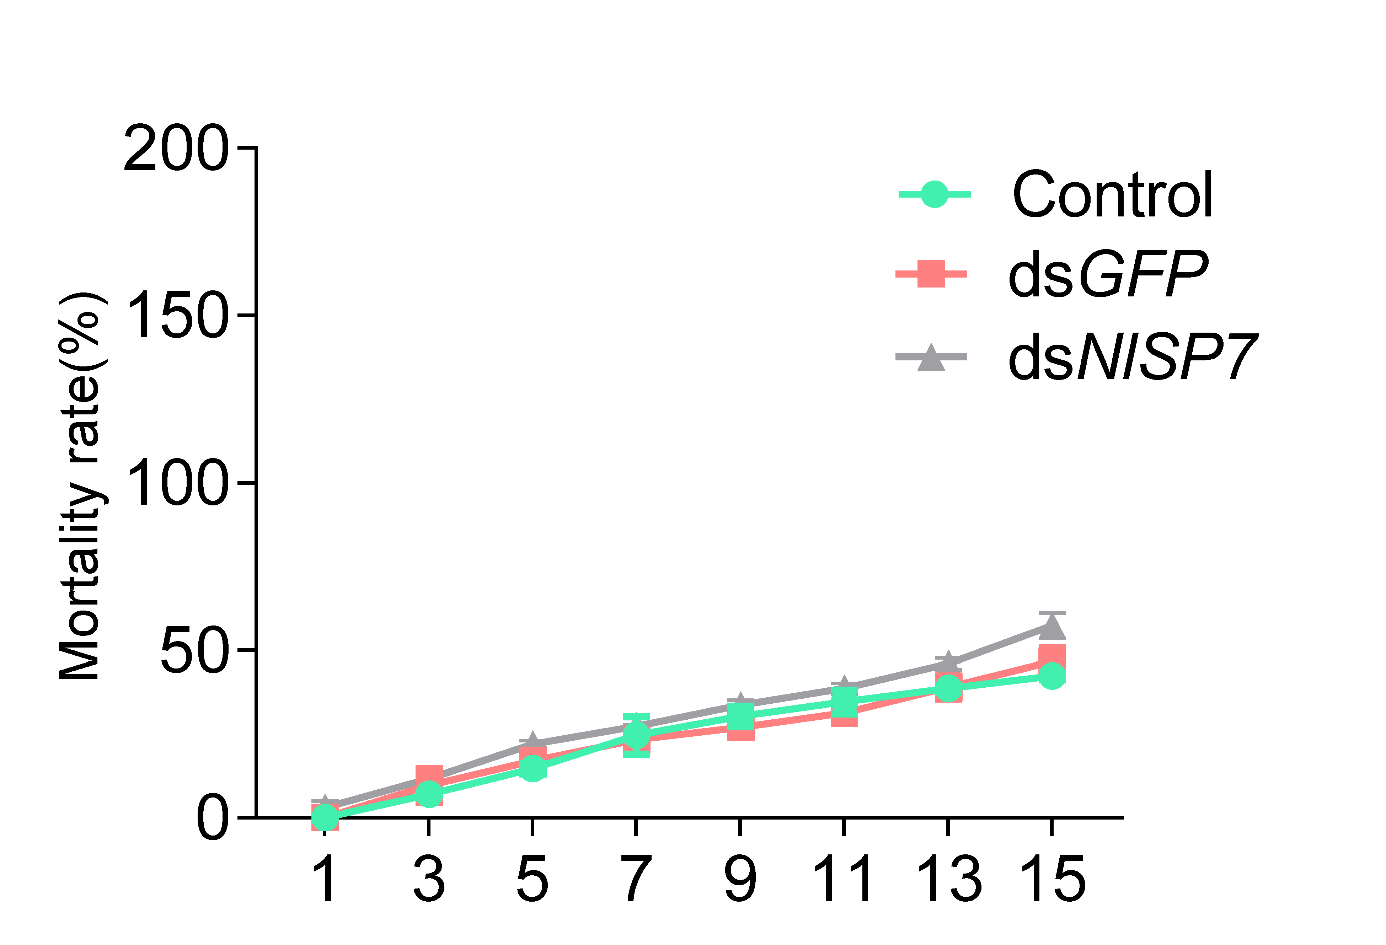


**Fig. S5** Mortality rate of BPHs fed an artificial diet with 0 mg/l tricin, repeated three times. Each treatment repeated with 100 brown planthoppers. Data are represented as the mean ± SD (*P* < 0.01, Duncan’s multiple range test).


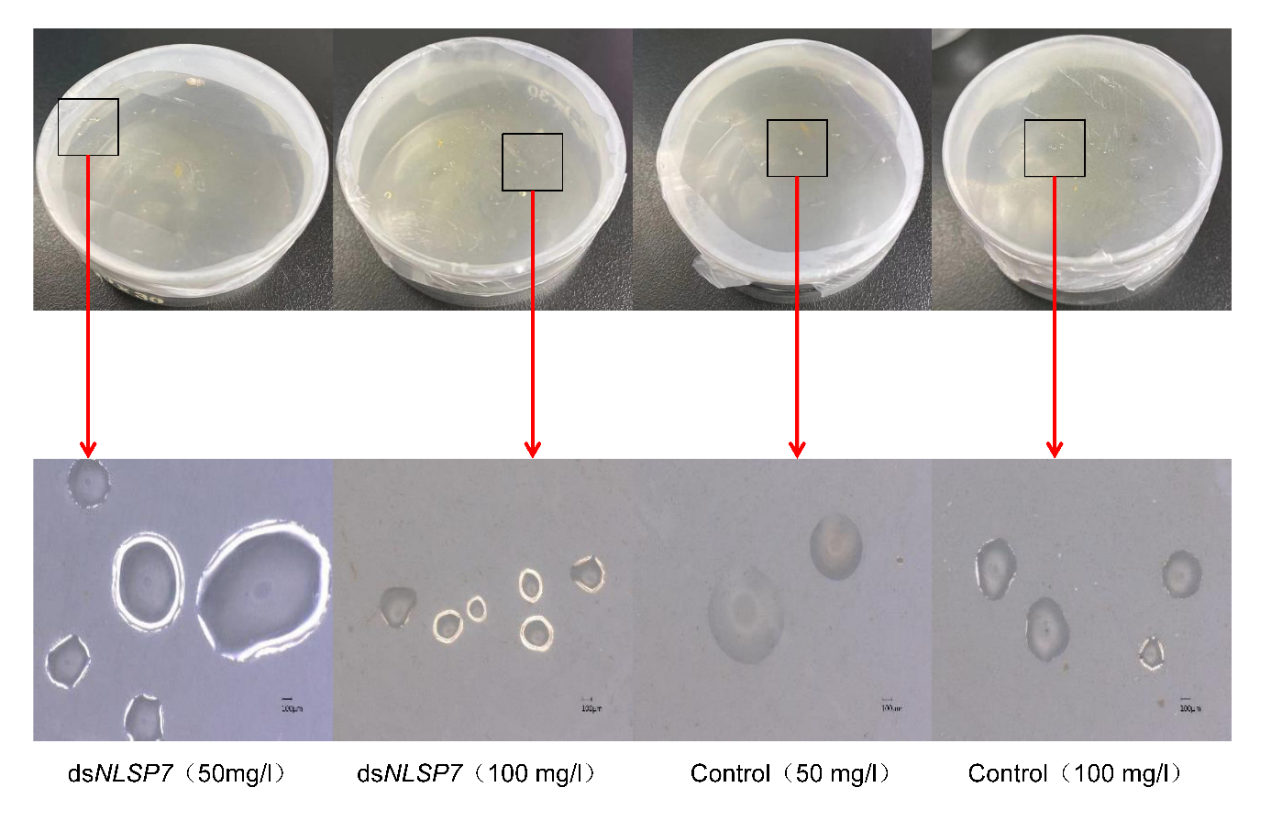


**Fig. S6** Effect of *NLSP7* expression silencing on salivary flanges based on an artificial diet with different tricin concentrations. Significant differences were observed for different concentrations of tricin. Each bar represents the mean ± SD from 30 replicates. Bars with different letters indicate significant differences among the three treatments (*P* < 0.01, Duncan’s multiple range test).**Table S1.**Primers used for qRT-PCR and PCR.

| **Gene** | **Description** | **Forward primer (5'-…-3')** | **Reverse primer (5'…-3')** |  |  |  |  |  |  |  |  |  |  |  |
| --- | --- | --- | --- | --- | --- | --- | --- | --- | --- | --- | --- | --- | --- | --- |
| *NLSP7* | QPCR | AAGAAAGGCAAGAGCAAG | GTAGGCTGCACATAAGGA |  |  |  |  |  |  |  |  |  |  |  |
| *NLSP7* | Cloning | ATGAGGGCTGCCCTGATT | TAGACAACCTGTGGTCCA |  |  |  |  |  |  |  |  |  |  |  |
| *NLSP7* | dsRNA synthesis | GGATCCTAATACGACTCACTATAGG  ATGAGGGCTGCCCTGATT | GGATCCTAATACGACTCACTATAGG  TAGACAACCTGTGGTCCA |  |  |  |  |  |  |  |  |  |  |  |
| *GFP* | dsRNA synthesis | GGATCCTAATACGACTCACTATAGGAA  GGGCGAGGAGCTGTTCACCG | GGATCCTAATACGACTCACTATAGGCA  GCAGGACCATGTGATCGCGC |  |  |  |  |  |  |  |  |  |  |  |
